# Supplementary material for: Relative Validity and Reproducibility of a Food Frequency Questionnaire to Assess Nutrients and Food Groups of Relevance to the Gut Microbiota in Young Children
Source: PubMed Central journal article supplement (PMC6266661; doi:10.3390/nu10111627), 2018-11-02
Supplement: nutrients-10-01627-s001.pdf [file nutrients-10-01627-s001.pdf]

1 **Supplementary material**

2 **Table S1.** Mean daily intake, mean difference and limits of agreement for selected nutrients of relevance to the gut microbiota according to WDR and crude EAT5 FFQ in  
3 5-year old children (n = 100).<sup>1</sup>

| Nutrient          | WDR               |              | Crude FFQ         |              | Crude FFQ vs WDR |             |                       |                  |
|-------------------|-------------------|--------------|-------------------|--------------|------------------|-------------|-----------------------|------------------|
|                   | Mean <sup>2</sup> | (95% CI)     | Mean <sup>2</sup> | (95% CI)     | Mean diff        | (95% CI)    | <i>p</i> <sup>3</sup> | LOA <sup>4</sup> |
| Energy (kJ)       | 5845              | (5613, 6086) | 6866              | (6488, 7267) | 1187             | (774, 1595) | <0.001                | -2952-5322       |
| Carbohydrate (g)  | 181               | (173, 190)   | 201               | (191, 213)   | 24               | (12, 36)    | <0.001                | -98-146          |
| Fiber (g)         | 18                | (17, 19)     | 23                | (22, 25)     | 5.5              | (4.0, 7.1)  | <0.001                | -10-21           |
| Total NSP (g)     | 15                | (14, 16)     | 19                | (18, 20)     | 4.1              | (2.8, 5.3)  | <0.001                | -8.6-16.7        |
| Soluble NSP (g)   | 6.3               | (5.9, 6.6)   | 9.9               | (9.2, 10.7)  | 4.0              | (3.3, 4.7)  | <0.001                | -3.4-11.4        |
| Insoluble NSP (g) | 8.9               | (8.3, 9.6)   | 9.1               | (8.5, 9.7)   | 0.02             | (-0.6, 0.7) | <b>0.945</b>          | -6.7-6.7         |

4 **Bold** = not statistically significant at  $p < 0.05$ . Abbreviations: CI, confidence interval; diff, difference; LOA, limits of agreement; NSP, non-starch polysaccharides. <sup>1</sup> FFQ1 or FFQ2 was  
5 randomly chosen for each participant; <sup>2</sup> Geometric mean; <sup>3</sup> Paired t-test; <sup>4</sup> Bland-Altman limits of agreement.

6

7 **Table S2.** Mean daily intake, mean difference and limits of agreement for other nutrients according to WDR, crude EAT5 FFQ and FV-EAT5 FFQ in 5-year old children (n =  
8 100).<sup>1</sup>

| Nutrient       | WDR               |              | Crude FFQ         |              | FV-FFQ            |              | FV-FFQ vs WDR |             |                       |                  |
|----------------|-------------------|--------------|-------------------|--------------|-------------------|--------------|---------------|-------------|-----------------------|------------------|
|                | Mean <sup>2</sup> | (95% CI)     | Mean <sup>2</sup> | (95% CI)     | Mean <sup>2</sup> | (95% CI)     | Mean diff     | (95% CI)    | <i>p</i> <sup>3</sup> | LOA <sup>4</sup> |
| Protein (g)    | 51                | (49, 53)     | 65                | (61, 70)     | 63                | (59, 67)     | 14            | (9.6, 18)   | <0.001                | -28-55           |
| Total fat (g)  | 50                | (47, 53)     | 62                | (58, 66)     | 59                | (56, 64)     | 11            | (6.7, 16)   | <0.001                | -35-58           |
| Sugar (g)      | 77                | (72, 82)     | 94                | (87, 100)    | 82                | (76, 89)     | 6.8           | (0.4, 13.3) | 0.039                 | -58-72           |
| Sodium (mg)    | 1560              | (1453, 1675) | 1901              | (1790, 2020) | 1793              | (1686, 1908) | 233           | (95, 371)   | 0.001                 | -1155-1621       |
| Calcium (mg)   | 593               | (548, 640)   | 730               | (669, 795)   | 686               | (628, 751)   | 123           | (58, 187)   | <0.001                | -532-777         |
| Iron (mg)      | 8.8               | (8.2, 9.5)   | 10.6              | (9.9, 11.3)  | 9.8               | (9.1, 10.5)  | 0.9           | (0.1, 1.6)  | 0.021                 | -6.4-8.2         |
| Vitamin C (mg) | 63                | (56, 70)     | 107               | (95, 119)    | 74                | (65, 84)     | 16            | (6.1, 25)   | 0.002                 | -81-113          |

9 **Bold** = not statistically significant at  $p < 0.05$ . Abbreviations: FV, fruit and vegetables adjusted; CI, confidence interval; diff, difference; LOA, limits of agreement. <sup>1</sup> FFQ1 or FFQ2 was  
10 randomly chosen for each participant; <sup>2</sup> Geometric mean; <sup>3</sup> Paired t-test; <sup>4</sup> Bland-Altman limits of agreement.

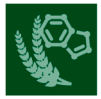

11 **Table S3.** Nutrients of relevance to the gut microbiota correlations between the crude EAT5 FFQ and  
 12 WDR (n = 100), and reproducibility (n = 99) in 5-year old children.

| Nutrient          | Relative validity <sup>1</sup> |                            | Reproducibility <sup>2</sup> |                    |
|-------------------|--------------------------------|----------------------------|------------------------------|--------------------|
|                   | Crude FFQ vs WDR <sup>3</sup>  | FV-FFQ vs WDR <sup>3</sup> | FV-FFQ1 vs FV-FFQ2           | FV-FFQ2 vs FV-FFQ1 |
| Energy (kJ)       | 0.32                           | 0.41                       | 0.88                         | 0.87               |
| Carbohydrate (g)  | 0.36                           | 0.26                       | 0.86                         | 0.85               |
| Fiber (g)         | 0.33                           | 0.42                       | 0.82                         | 0.88               |
| Total NSP (g)     | 0.32                           | 0.23                       | 0.82                         | 0.87               |
| Soluble NSP (g)   | 0.18                           | 0.50                       | 0.84                         | 0.90               |
| Insoluble NSP (g) | 0.34                           | 0.49                       | 0.80                         | 0.89               |

13 Abbreviations: NSP, non-starch polysaccharides. <sup>1</sup> Spearman’s correlation coefficients; <sup>2</sup> Intra-class correlation  
 14 coefficients; <sup>3</sup> FFQ1 or FFQ2 was randomly chosen for each participant.

15 **Table S4.** Other nutrients correlations between the crude EAT5 FFQ and WDR (n = 100), and  
 16 reproducibility (n = 99) in 5-year old children.

| Nutrient       | Relative validity <sup>1</sup> |                            | Reproducibility <sup>2</sup> |                    |
|----------------|--------------------------------|----------------------------|------------------------------|--------------------|
|                | Crude FFQ vs WDR <sup>3</sup>  | FV-FFQ vs WDR <sup>3</sup> | FV-FFQ1 vs FV-FFQ2           | FV-FFQ2 vs FV-FFQ1 |
| Protein (g)    | 0.43                           | 0.41                       | 0.87                         | 0.87               |
| Total fat (g)  | 0.25                           | 0.26                       | 0.85                         | 0.85               |
| Sugar (g)      | 0.36                           | 0.42                       | 0.88                         | 0.88               |
| Sodium (mg)    | 0.24                           | 0.23                       | 0.87                         | 0.87               |
| Calcium (mg)   | 0.49                           | 0.50                       | 0.90                         | 0.90               |
| Iron (mg)      | 0.46                           | 0.45                       | 0.89                         | 0.89               |
| Vitamin C (mg) | 0.51                           | 0.49                       | 0.81                         | 0.81               |

17 Abbreviations: FV, fruit and vegetables adjusted. <sup>1</sup> Spearman’s correlation coefficients; <sup>2</sup> Intra-class correlation  
 18 coefficients; <sup>3</sup> FFQ1 or FFQ2 was randomly chosen for each participant.

19

20 **Table S5.** Nutrients of relevance to the gut microbiota cross-classifications between the crude EAT5  
 21 FFQ and WDR in 5-year old children (n = 100). <sup>1</sup>

| Nutrient          | Cross-classification (Crude FFQ vs WDR) |                                   |                                      |                                 |
|-------------------|-----------------------------------------|-----------------------------------|--------------------------------------|---------------------------------|
|                   | % Correctly classified <sup>2</sup>     | % Correct & adjacent <sup>3</sup> | % Grossly misclassified <sup>4</sup> | % Correct extremes <sup>5</sup> |
| <i>Chance</i>     | 25%                                     | 62.5%                             | 12.5%                                | 12.5%                           |
| Energy (kJ)       | 32                                      | 79                                | 9                                    | 18                              |
| Carbohydrate (g)  | 38                                      | 77                                | 5                                    | 25                              |
| Fiber (g)         | 34                                      | 79                                | 5                                    | 20                              |
| Total NSP (g)     | 28                                      | 75                                | 9                                    | 16                              |
| Soluble NSP (g)   | 28                                      | 69                                | 9                                    | 19                              |
| Insoluble NSP (g) | 38                                      | 75                                | 7                                    | 20                              |

22 Abbreviations: NSP, non-starch polysaccharides. <sup>1</sup> FFQ1 or FFQ2 was randomly chosen for each participant; <sup>2</sup> %  
 23 Correctly classified = percentage of children with WDRs and FFQ intakes in the same quartile; <sup>3</sup> % Correct and  
 24 adjacent = percentage of children with WDRs and FFQ intakes in the same and 1 adjacent quartile; <sup>4</sup> % Grossly  
 25 misclassified = percentage of children with WDRs intakes in the highest quartile and FFQ intakes in the lowest  
 26 quartile and vice versa; <sup>5</sup> % Correctly classified to extreme quartiles = percentage of children with WDRs and  
 27 FFQ intakes correctly classified to the lowest and highest quartiles.

28  
29**Table S6.** Other nutrients cross-classifications between the crude EAT5 FFQ and WDR in 5-year old children (n = 100). <sup>1</sup>

| Nutrient       | Cross-classification (FV-FFQ vs WDR) |                                   |                                      |                                 |
|----------------|--------------------------------------|-----------------------------------|--------------------------------------|---------------------------------|
|                | % Correctly classified <sup>2</sup>  | % Correct & adjacent <sup>3</sup> | % Grossly misclassified <sup>4</sup> | % Correct extremes <sup>5</sup> |
| <i>Chance</i>  | 25%                                  | 62.5%                             | 12.5%                                | 12.5%                           |
| Protein (g)    | 42                                   | 78                                | 8                                    | 24                              |
| Total fat (g)  | 29                                   | 67                                | 6                                    | 20                              |
| Sugar (g)      | 40                                   | 78                                | 4                                    | 24                              |
| Sodium (mg)    | 32                                   | 71                                | 9                                    | 17                              |
| Calcium (mg)   | 43                                   | 84                                | 3                                    | 27                              |
| Iron (mg)      | 39                                   | 78                                | 5                                    | 24                              |
| Vitamin C (mg) | 31                                   | 78                                | 1                                    | 22                              |

30 Abbreviations: FV, fruit and vegetables adjusted. <sup>1</sup> FFQ1 or FFQ2 was randomly chosen for each participant; <sup>2</sup> %  
 31 Correctly classified = percentage of children with WDRs and FFQ intakes in the same quartile; <sup>3</sup> % Correct and  
 32 adjacent = percentage of children with WDRs and FFQ intakes in the same and 1 adjacent quartile; <sup>4</sup> % Grossly  
 33 misclassified = percentage of children with WDRs intakes in the highest quartile and FFQ intakes in the lowest  
 34 quartile and vice versa; <sup>5</sup> % Correctly classified to extreme quartiles = percentage of children with WDRs and  
 35 FFQ intakes correctly classified to the lowest and highest quartiles.

36  
37

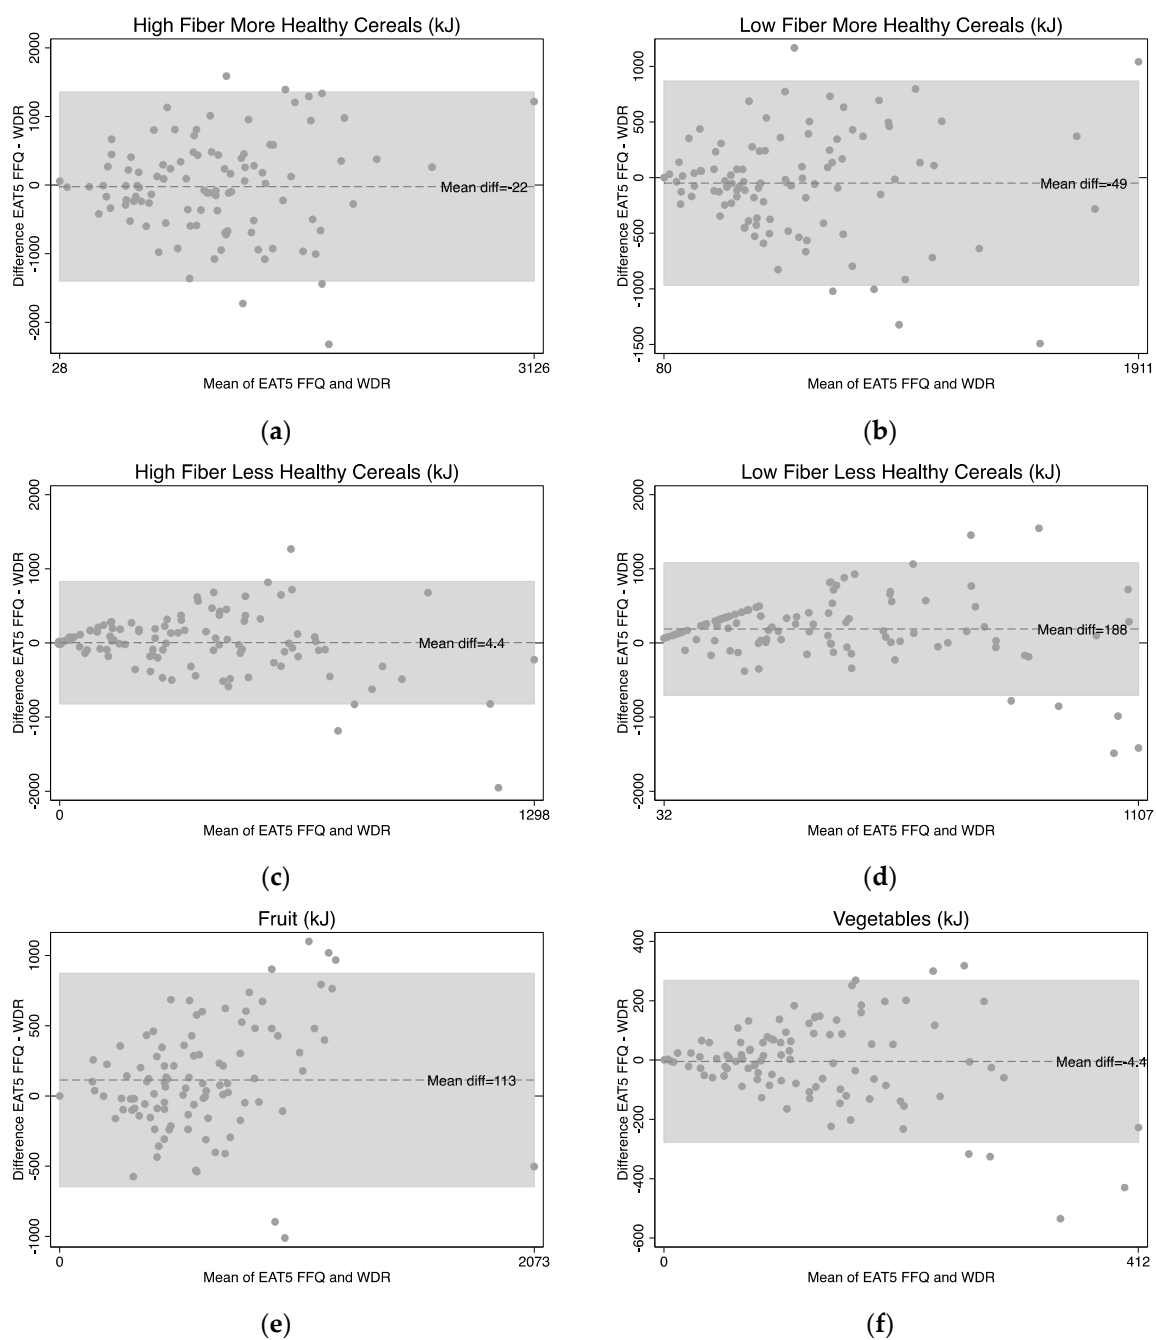

38 **Figure S1.** Bland-Altman plots of food group intakes (energy contribution) from a randomly chosen  
 39 FFQ1 or FFQ2 EAT5 FFQ ('fruit and vegetable adjusted') and WDR: (a) High fiber more healthy  
 40 cereals; (b) Low fiber more healthy cereals; (c) High fiber less healthy cereals; (d) Low fiber less  
 41 healthy cereals; (e) Fruit; and (f) Vegetables.

42  
43

**Table S7.** Mean daily intake, mean difference and limits of agreement for food groups (in grams) of relevance to the gut microbiota according to WDR and EAT5 FFQ in 5-year old children (n = 100).<sup>1,2</sup>

| Food group acronym                  | WDR               |            | EAT5 FFQ          |            | EAT5 FFQ vs WDR |             |                       |                  |
|-------------------------------------|-------------------|------------|-------------------|------------|-----------------|-------------|-----------------------|------------------|
|                                     | Mean <sup>3</sup> | (95% CI)   | Mean <sup>3</sup> | (95% CI)   | Mean diff       | (95% CI)    | <i>p</i> <sup>4</sup> | LOA <sup>5</sup> |
| High fiber more healthy cereals (g) | 75                | (65, 88)   | 72                | (62, 85)   | 1.7             | (-11, 14)   | <b>0.794</b>          | -124, 128        |
| Low fiber more healthy cereals (g)  | 51                | (43, 60)   | 81 <sup>6</sup>   | (70, 94)   | 39              | (25, 53)    | <0.001                | -105, 183        |
| High fiber less healthy cereals (g) | 19                | (16, 23)   | 16                | (13, 20)   | 0.3             | (-5.4, 5.9) | <b>0.922</b>          | -57, 57          |
| Low fiber less healthy cereals (g)  | 19                | (15, 24)   | 28                | (23, 33)   | 17              | (10, 24)    | <0.001                | -52, 86          |
| Nuts and legumes (g)                | 10                | (7, 14)    | 16                | (12, 21)   | 11              | (5.3, 16)   | <0.001                | -43, 64          |
| Fruits (g)                          | 178               | (155, 204) | 214               | (188, 243) | 47              | (18, 76)    | 0.002                 | -246, 339        |
| Vegetables (g)                      | 70                | (59, 84)   | 55                | (43, 68)   | -5.9            | (-21, 9.0)  | <b>0.433</b>          | -156, 144        |
| Potatoes (g)                        | 34                | (28, 42)   | 19                | (16, 22)   | -9.1            | (-15, -3.4) | 0.002                 | -67, 49          |
| Dairy (g)                           | 139               | (118, 163) | 169               | (138, 207) | 70              | (37, 103)   | <0.001                | -262, 403        |
| Yoghurt (g)                         | 61                | (51, 71)   | 55                | (45, 66)   | 8.6             | (-0.7, 18)  | <b>0.068</b>          | -85, 102         |
| Meat, fish, egg (g)                 | 68                | (60, 78)   | 89                | (78, 100)  | 24              | (15, 32)    | <0.001                | -64, 111         |
| Miscellaneous (g)                   | 85                | (71, 100)  | 100               | (86, 117)  | 15              | (-2.7, 33)  | <b>0.094</b>          | -167, 197        |

44  
45  
46  
47

**Bold** = not statistically significant at  $p < 0.05$ . Abbreviations: CI, confidence interval; diff, difference; LOA, limits of agreement. <sup>1</sup> Data are for the 'fruit and vegetable adjusted' EAT5 FFQ; <sup>2</sup> FFQ1 or FFQ2 was randomly chosen for each participant; <sup>3</sup> Geometric mean; <sup>4</sup> Paired t-test; <sup>5</sup> Bland-Altman limits of agreement; <sup>6</sup> Contains porridge in this food group which includes water in the FFQ nutrient line calculation but in the food diary, porridge may be dried oats/ rolled oats on its own.

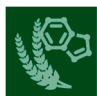

48  
49

**Table S8.** Food group (in grams) correlations between the EAT5 FFQ and WDR (n = 100), and reproducibility correlations (n = 99) in 5-year old children. <sup>1</sup>

| Food group                          | Relative validity <sup>2</sup> | Reproducibility <sup>3</sup> |
|-------------------------------------|--------------------------------|------------------------------|
|                                     | EAT5 FFQ <sup>4</sup> vs WDR   | EAT5 FFQ1 vs EAT5 FFQ2       |
| High fiber more healthy cereals (g) | 0.40                           | 0.83                         |
| Low fiber more healthy cereals (g)  | 0.39                           | 0.88                         |
| High fiber less healthy cereals (g) | 0.37                           | 0.79                         |
| Low fiber less healthy cereals (g)  | 0.28                           | 0.81                         |
| Nuts and legumes (g)                | 0.38                           | 0.70                         |
| Fruits (g)                          | 0.33                           | 0.80                         |
| Vegetables (g)                      | 0.29                           | 0.86                         |
| Potatoes (g)                        | 0.48                           | 0.63                         |
| Dairy (g)                           | 0.62                           | 0.93                         |
| Yoghurt (g)                         | 0.54                           | 0.81                         |
| Meat, fish, egg (g)                 | 0.63                           | 0.82                         |
| Miscellaneous (g)                   | 0.53                           | 0.84                         |

50  
51

<sup>1</sup> Data are for the ‘fruit and vegetable adjusted’ EAT5 FFQ; <sup>2</sup> Spearman’s correlation coefficients; <sup>3</sup> Intra-class correlation coefficients; <sup>4</sup> FFQ1 or FFQ2 was randomly chosen for each participant.

52  
53

**Table S9.** Food group (in grams) cross-classifications between EAT5 FFQ and WDR quartiles in 5-year old children (n = 100). <sup>1,2</sup>

| Food group                          | Cross-classification                |                                   |                                      |                                 |
|-------------------------------------|-------------------------------------|-----------------------------------|--------------------------------------|---------------------------------|
|                                     | % Correctly classified <sup>3</sup> | % Correct & adjacent <sup>4</sup> | % Grossly misclassified <sup>5</sup> | % Correct extremes <sup>6</sup> |
| <i>Chance</i>                       | 25%                                 | 62.5%                             | 12.5%                                | 12.5%                           |
| High fiber more healthy cereals (g) | 35                                  | 74                                | 7                                    | 20                              |
| Low fiber more healthy cereals (g)  | 37                                  | 79                                | 6                                    | 23                              |
| High fiber less healthy cereals (g) | 37                                  | 75                                | 5                                    | 22                              |
| Low fiber less healthy cereals (g)  | 33                                  | 70                                | 6                                    | 21                              |
| Nuts and legumes (g)                | 38                                  | 78                                | 8                                    | 22                              |
| Fruits (g)                          | 40                                  | 71                                | 7                                    | 20                              |
| Vegetables (g)                      | 30                                  | 70                                | 8                                    | 18                              |
| Potatoes (g)                        | 40                                  | 83                                | 3                                    | 25                              |
| Dairy (g)                           | 53                                  | 86                                | 3                                    | 31                              |
| Yoghurt (g)                         | 51                                  | 83                                | 4                                    | 30                              |
| Meat, fish, egg (g)                 | 46                                  | 84                                | 2                                    | 30                              |
| Miscellaneous (g)                   | 41                                  | 85                                | 4                                    | 25                              |

54  
55  
56  
57  
58  
59  
60  
61

<sup>1</sup> Data are for the ‘fruit and vegetable adjusted’ EAT5 FFQ; <sup>2</sup> FFQ1 or FFQ2 was randomly chosen for each participant; <sup>3</sup> % Correctly classified = percentage of children with WDR and FFQ intakes in the same quartile; <sup>4</sup> % Correct and adjacent = percentage of children with WDR and FFQ intakes in the same and adjacent quartiles; <sup>5</sup> % Grossly misclassified = percentage of children with WDR intakes in the highest quartile and FFQ intakes in the lowest quartile and vice versa; <sup>6</sup> % Correctly classified to extreme quartiles = percentage of children with WDR and FFQ intakes correctly classified to the lowest and highest quartiles.
